# Supplementary material
Source: PubMed Central journal article supplement (PMC7453631)
Supplement: NIHMS1612857-supplement-Supplementary_Tables_S1_and_S2.pdf [file NIHMS1612857-supplement-Supplementary_Tables_S1_and_S2.pdf]

**Supplement to:** Cohen AD, Raje N, Fowler JA, Mezzi K, Scott EC, Dhodapkar MV. How to Train Your T Cells: Overcoming Immune Dysfunction in Multiple Myeloma

Supplementary Table S1. Ongoing vaccine trials with unpublished data for MM disease stages with lower tumor burden/immunosuppression<sup>a</sup>

| Target(s)                   | Immuno-oncology agent                      | Clinical trial identifier (phase) | N         | Patient population                                              | Regimen(s)                                                                                                     |
|-----------------------------|--------------------------------------------|-----------------------------------|-----------|-----------------------------------------------------------------|----------------------------------------------------------------------------------------------------------------|
| PD-L1                       | PD-L1 peptide vaccine                      | NCT03042793 (Phase 1)             | 10 (est.) | Patients with MM newly treated with HDT and no signs of relapse | PD-L1 peptide vaccine with Montanide ISA-51                                                                    |
|                             | PD-L1 peptide vaccine                      | NCT03850522 (Phase 2a)            | 20 (est.) | High-risk SMM                                                   | Single agent                                                                                                   |
| DKK1                        | DC DKK1 vaccine                            | NCT03591614 (Early Phase 1)       | 18 (est.) | MGUS, SMM, or MM                                                | Single agent                                                                                                   |
| Survivin                    | SVN53-67/M57-KLH peptide vaccine (SurVaxM) | NCT02334865 (Phase 1)             | 18 (est.) | NDMM patients receiving Len maintenance therapy                 | SurVaxM + Len maintenance                                                                                      |
| Neoantigen                  | Personalized neoantigen peptide vaccine    | NCT03631043 (Early Phase 1)       | 30 (est.) | SMM                                                             | Single agent                                                                                                   |
| CT7, MAGE-A3, and WT1       | mRNA-electroporated DCs                    | NCT01995708 (Phase 1)             | 28        | MM patients undergoing autoSCT                                  | mRNA-electroporated autologous Langerhans-type DCs after autoSCT versus standard supportive care after autoSCT |
| XBP1, CD138, and SLAMF7/CS1 | Multi-peptide vaccine (PVX-410)            | NCT02886065 (Phase 1)             | 20 (est.) | SMM                                                             | PVX-410 and Citarinostat ± Len                                                                                 |
| Whole tumor antigens        | Allogeneic GM-CSF vaccine (GVAX)           | NCT03376477 (Phase 2)             | 54 (est.) | MM patients in complete or near complete remission              | Len-GVAX-Prevnar13 versus Len-GVAX versus Len                                                                  |
|                             | DC/MM fusion vaccine                       | NCT00458653 (Phase 1)             | 45        | Transplant-eligible MM                                          | DC/MM fusion vaccine after autoSCT<br>DC/MM fusion vaccine before and after autoSCT                            |
|                             |                                            | NCT02728102 (Phase 2)             | 203       | Transplant-eligible MM                                          | Vaccine with Len and GM-CSF versus Len with GM-CSF versus Len maintenance                                      |

Abbreviations: AutoSCT, autologous stem cell transplant; DC, dendritic cell; DC/MM, dendritic cell/multiple myeloma hybridoma; est., estimated; GM-CSF, granulocyte macrophage colony stimulating factor; HDT, high-dose therapy; Len, lenalidomide; MGUS, monoclonal gammopathy of undetermined significance; MM, multiple myeloma; SMM, smoldering multiple myeloma.

Based on [www.clinicaltrials.gov](http://www.clinicaltrials.gov) search conducted on February 20, 2019.

<sup>a</sup>Studies in relapsed and/or refractory MM are not shown, as the focus of more recent vaccine therapy trials has been for disease stages with lower tumor burden/immunosuppression.

Supplementary Table S2. CPI-based trials in patients with relapsed and/or refractory MM with unpublished data

| Target                  | Immuno-oncology agent   | Clinical Trial Identifier (phase, study name) | N                         | Patient population                                                  | Regimen(s)                                                                                 |
|-------------------------|-------------------------|-----------------------------------------------|---------------------------|---------------------------------------------------------------------|--------------------------------------------------------------------------------------------|
| PD-1                    | Pembrolizumab           | NCT02636010 (Phase 2)                         | 20                        | MM patients with residual disease after treatment                   | Single agent                                                                               |
|                         |                         | NCT03267888 (Phase 1)                         | 24 (est.)                 | Relapsed or refractory MM                                           | Pembro-radiation therapy                                                                   |
|                         |                         | NCT02362035 (Phase 1b/2, KEYNOTE 145)         | 159                       | Hematologic malignancies                                            | Pembro-acalabrutinib                                                                       |
|                         | Nivolumab               | NCT02681302 (Phase 1b/2a, CPIT001)            | 42 (est.)                 | MM patients at high risk for posttransplant recurrence <sup>a</sup> | Nivo-ipilimumab after autoSCT                                                              |
|                         |                         | NCT03588936 (Phase 1)                         | 12 (est.)                 | Relapsed hematologic malignancies after alloSCT                     | Nivo-tocilizumab after alloSCT                                                             |
|                         |                         | NCT03782064 (Phase 2)                         | 25 (est.)                 | Relapsed MM                                                         | Nivo-DC/MM vaccine                                                                         |
|                         |                         | NCT03184194 (Phase 2)                         | 60 (est.)                 | Relapsed or refractory MM                                           | Nivo-dara±cyclophosphamide                                                                 |
|                         |                         | NCT03605719 (Phase 1)                         | 62 (est.)                 | Relapsed/refractory MM                                              | Nivo-Kd ± reovirus                                                                         |
|                         |                         | NCT03634800 (Phase 2, RISE-M)                 | 30 (est.)                 | Refractory or relapsed and refractory MM                            | Nivo-radiation therapy                                                                     |
|                         |                         | NCT02726581 (Phase 3, CheckMate 602)          | 406 (est.)                | Refractory or relapsed and refractory MM                            | Nivo-Elo-Pom-Dex<br>Pom-Dex ± Nivo                                                         |
|                         | Pidilizumab (CT-011)    | NCT01067287 (Phase 2)                         | 35 (est.)                 | Transplant-eligible MM                                              | Pidilizumab-DC/MM vaccine following SCT                                                    |
| NCT02077959 (Phase 1/2) |                         | 20                                            | Relapsed or refractory MM | Pidilizumab-Len                                                     |                                                                                            |
| JNJ-63723283            | NCT03357952 (Phase 2/3) | 10                                            | Relapsed or refractory MM | Dara ± JNJ-63723283                                                 |                                                                                            |
| Cemiplimab (REGN2810)   | NCT03194867 (Phase 1/2) | 105 (est.)                                    | Relapsed/Refractory MM    | Isa ± cemiplimab                                                    |                                                                                            |
| PD-L1                   | Atezolizumab            | NCT02431208 (Phase 1b)                        | 300 (est.)                | Relapsed or Refractory MM and post auto-SCT                         | Atezo ± Len<br>Atezo-Dara ± Len<br>Atezo-Dara-Pom<br>Dara-Pom-Dex                          |
|                         | TTI-622                 | NCT03530683 (Phase 1, TTI-622-01)             | 156 (est.)                | Advanced relapsed or refractory MM <sup>a</sup>                     | Single agent<br>TTI-622-Rituximab<br>TTI-622-Pembro/Nivo<br>TTI-622-Bort-Dex<br>TTI-622-Kd |

Abbreviations: AlloSCT, allogeneic stem cell transplantation; Atezo, atezolizumab; autoSCT, autologous stem cell transplantation; Bort, bortezomib; CPI, checkpoint inhibitor; Dara, daratumumab; DC/MM, dendritic cell/multiple myeloma hybridoma; Dex, dexamethasone; Durva, durvalumab; Elo, elotuzumab; est., estimated; Isa, isatuximab; Kd, carfilzomib-dexamethasone; Len, lenalidomide; MM, multiple myeloma; Nivo, nivolumab; Pembro, pembrolizumab; Pom, pomalidomide; SCT, stem cell transplantation.

<sup>a</sup>Trials also include lymphoma patients.

Based on www.clinicaltrials.gov search conducted on February 20, 2019.
